# Supplementary material for: Improved degradation of anaerobically digested sludge during post aerobic digestion using ultrasonic pretreatment
Source: Royal Society of Chemistry journal article supplement (doi:10.1039/c7ew00051k), 2017-01-01
Supplement: c7ew00051k1.pdf [file c7ew00051k1.pdf]

## [Electronic supplementary information]

### 1 **Improved degradation of anaerobically digested sludge during post** 2 **aerobic digestion using ultrasonic pretreatment**

3  
4 Kang Song<sup>a</sup>, Guo-Jun Xie<sup>d</sup>, Jin Qian<sup>e</sup>, Philip L Bond<sup>d</sup>, Dongbo Wang<sup>f</sup>, Beibei Zhou<sup>a</sup>, Yiqi Liu<sup>\*g</sup>, Qilin  
5 Wang<sup>\*b,c,d</sup>

6  
7 <sup>a</sup>Department of Chemical Engineering, Tokyo University of Agriculture and Technology, 2-24-16  
8 Naka, Koganei, Tokyo 184-8588, Japan

9 <sup>b</sup>Griffith School of Engineering, Griffith University, Nathan Campus, QLD 4111, Australia

28 <sup>c</sup>Centre for Clean Environment and Energy, Griffith University, Gold Coast Campus, QLD 4222,  
29 Australia

30 <sup>d</sup>Advanced Water Management Centre, The University of Queensland, St Lucia, QLD 4072, Australia

31 <sup>e</sup>Department of Applied Chemistry, School of Natural and Applied Sciences, Northwestern  
32 Polytechnical University, NO. 127 West Youyi Road, Xi'an 710072, China

33 <sup>f</sup>College of Environmental Science and Engineering, Hunan University, Changsha 410082, China

34 <sup>g</sup>School of Automation Science & Engineering, South China University of Technology, Wushan Road,  
35 Guang Zhou 510640, China

36

37 \*Corresponding authors:

38 Dr. Qilin Wang, E-mail: [qilin.wang@griffith.edu.au](mailto:qilin.wang@griffith.edu.au); Tel.: +61 7 3735 5036

39 Dr. Yiqi Liu, E-mail: [aulyq@scut.edu.cn](mailto:aulyq@scut.edu.cn); Tel.: +86 15814826119; Fax: +86 20 87114189.

40

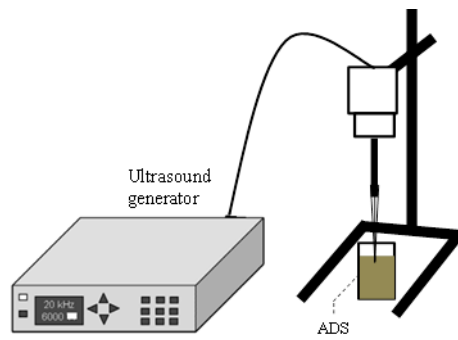

41

42

**Fig. S-1.** Schematic of sonication system

43

44

45

46

47

**Before:**

**R1**

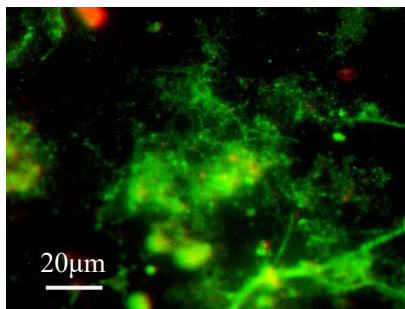

**R2**

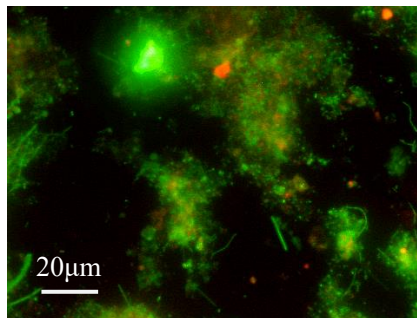

**R3**

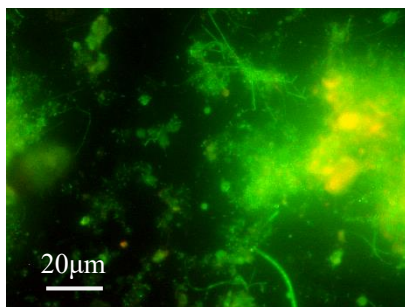

**R4**

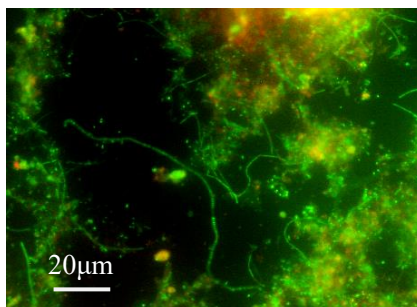

**After:**

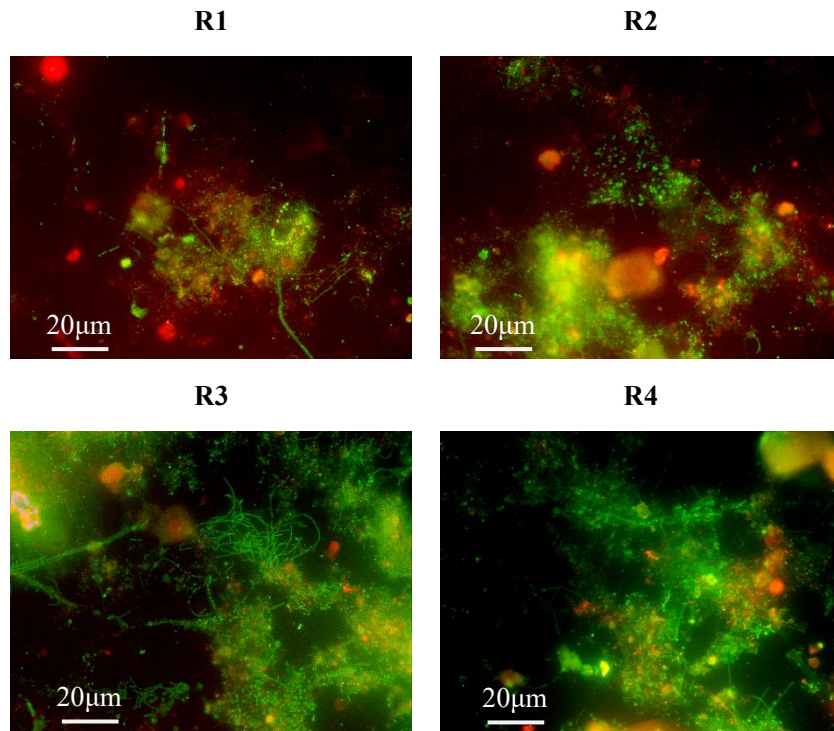

48 **Fig. S-2.** Microscopic images of LIVE/DEAD® staining on the sludges from each reactor R1, R2,  
49 R3 and R4 on day 0 (Before) and on day 5 (After).

50
